# Supplementary material for: Actinide-mediated coupling of 4-fluorobenzonitrile: synthesis of an eight-membered thorium(iv) tetraazametallacycle
Source: Royal Society of Chemistry journal article supplement (doi:10.1039/b614050e), 2007-01-01
Supplement: b614050e.pdf [file b614050e.pdf]

# Actinide-Mediated Coupling of 4-Fluorobenzonitrile: Synthesis of an Eight-Membered Thorium(IV) Tetraazametallacycle

Eric J. Schelter, David E. Morris, Brian L. Scott and Jaqueline L. Kiplinger\*

Los Alamos National Laboratory

Los Alamos, NM 87545, USA

Fax: +01 505 667 9905 ; Tel: +01 505 665 9553; E-mail: kiplinger@lanl.gov

## Electronic Supplementary Information:

**S2-S3:** General Synthetic Considerations.

**S4:** Synthetic Details and Characterization for  $(C_5Me_5)_2Th[-N=C(CH_3)(4-F-C_6H_4)]_2$  (**2**).

**S5:** Crystal Data and Structure Refinement for  $(C_5Me_5)_2Th[-N=C(CH_3)(4-F-C_6H_4)]_2$  (**2**).

**S6-S8:** Table of Bond Distances and Angles for  $(C_5Me_5)_2Th[-N=C(CH_3)(4-F-C_6H_4)]_2$  (**2**).

**S9:** Crystal Data and Structure Refinement for  $(C_5Me_5)_2Th[-N=C(4-F-C_6H_4)-N=C(4-F-C_6H_4)-N-C(4-F-C_6H_4)=N-C(4-F-C_6H_4)(CH_3)_2]$  (**3**).

**S10-S14:** Table of Bond Distances and Angles for  $(C_5Me_5)_2Th[-N=C(4-F-C_6H_4)-N=C(4-F-C_6H_4)-N-C(4-F-C_6H_4)=N-C(4-F-C_6H_4)(CH_3)_2]$  (**3**).

## General Synthetic Considerations.

Reactions and manipulations were performed at 20 °C in a recirculating Vacuum Atmospheres Model HE-553-2 inert atmosphere (N<sub>2</sub> or He) drybox with a MO-40-2 Dri-Train, or using standard Schlenk and high vacuum line techniques. Glassware was dried overnight at 150 °C before use. All NMR spectra were obtained using a Bruker Avance 300 MHz spectrometer. Cyclic voltammetric data were obtained in the Vacuum Atmospheres drybox system described above. All data were collected using a Perkin-Elmer Princeton Applied Research Corporation (PARC) Model 263 potentiostat under computer control with PARC Model 270 software. All sample solutions were ~5 mM in complex with 0.1 M [(*n*-C<sub>4</sub>H<sub>9</sub>)<sub>4</sub>N][B(C<sub>6</sub>F<sub>5</sub>)<sub>4</sub>] supporting electrolyte in THF solvent. X-ray data were collected using a Bruker APEX2 diffractometer. Structural solution and refinement was achieved using the SHELXL97 program suite. Details regarding data collection are provided in the CIF files.

Benzene-*d*<sub>6</sub> and toluene-*d*<sub>8</sub> were obtained from Cambridge Isotope Laboratories (CIL) and were purified by storage over activated 4 Å molecular sieves prior to use. Chemical shifts were referenced to protio solvent impurities, which are referenced to internal Si(CH<sub>3</sub>)<sub>4</sub> at δ 0.00 ppm, or to CFC<sub>3</sub> (<sup>19</sup>F) at δ -63.48 ppm. Mass spectrometric (MS) analyses were obtained at the University of California, Berkeley Mass Spectrometry Facility, using either VG ProSpec (EI) or VG70-SE (FAB) mass spectrometers. Elemental analyses were performed at the University of California, Berkeley Microanalytical Facility, on a Perkin-Elmer Series II 2400 CHNS analyzer. 4-Fluorobenzonitrile (Aldrich) was used as received. Celite (Aldrich) and alumina (Brockman I, Aldrich) were dried in vacuo at 250 °C for 48 h prior to use. Anhydrous toluene (Aldrich) and pentane (Aldrich), diethyl ether (Aldrich), and tetrahydrofuran (Aldrich) were passed through a column of activated alumina (A2, 12 × 32, Purifry) under nitrogen and stored over activated 4 Å

molecular sieves prior to use.  $(C_5Me_5)_2Th(CH_3)_2$  was prepared according to literature procedures.<sup>1</sup> *Caution:* Natural thorium (isotope  $^{232}Th$ ) is a weak  $\alpha$ -emitter with a half-life  $1.41 \times 10^{10}$  years; manipulations and reactions should be carried out in monitored fume hoods or in an inert atmosphere drybox in a radiation laboratory equipped with  $\alpha$ - and  $\beta$ -counting equipment.

(1) Fagan, P. J.; Manriquez, J. M.; Maatta, E. A.; Seyam, A. M.; Marks, T. J., *J. Am. Chem. Soc.* **1981**, *103*, 6650-6667.

**Synthesis of  $(C_5Me_5)_2Th[-N=C(CH_3)(4-F-C_6H_4)]_2$  (**2**).** A toluene solution (10 mL) of 4-fluorobenzonitrile (0.16 g, 1.4 mmol) was slowly added dropwise with stirring to a toluene solution (40 mL) containing  $(C_5Me_5)_2Th(CH_3)_2$  (**1**) (0.23 g, 0.62 mmol). Excess nitrile solution was rinsed into the reaction mixture with additional toluene (3 x 2 mL). The reaction mixture immediately change color from clear and colorless to bright yellow. The solution was stirred for 1 h and the volatiles removed under reduced pressure. The resulting yellow residue was dissolved in ~ 50 mL pentane, filtered through a Celite-packed coarse-porosity frit, the filtrate was collected, and the volatiles were removed under reduced pressure to give crude **2** as a yellow solid. Recrystallization from pentane at  $-30$  °C afforded **2** as a bright yellow crystalline solid. Yield 0.23 g, 0.30 mmol, 48%.  $^1H$ -NMR ( $C_6D_6$ , 300 MHz, 298 K):  $\delta$  7.64 (dd,  $J_1 = 8.7$  Hz,  $J_2 = 5.3$  Hz, 4H, meta Ar-*H*), 6.87 (t,  $J_{HH} = 8.6$  Hz, 4H, ortho Ar-*H*), 2.31 (s, 6H, - $CH_3$ ), 1.97 (s, 30H,  $C_5(CH_3)_5$ ).  $^{13}C$ -NMR ( $C_6D_6$ , 300 MHz, 298 K):  $\delta$  167.89 (s, N=C), 164.46 (d,  $J_{CF} = 987$  Hz, F-C), 138.21 (d,  $J_{CF} = 1.2$  Hz, quat Ar-C), 129.42 (d,  $J_{CF} = 33$  Hz, ortho Ar-C), 122.99 (s,  $C_5(CH_3)_5$ ), 115.28 (d,  $J_{CF} = 84$  Hz, meta Ar-C), 30.46 (s, - $CH_3$ ), 11.53 (s,  $C_5(CH_3)_5$ ).  $^{19}F$ -NMR ( $C_6D_6$ , 300 MHz, 298 K):  $\delta$  -113.52 (m,  $C_6H_5F$ ). UV-Vis-NIR,  $cm^{-1}$  ( $\epsilon$ ,  $M^{-1} cm^{-1}$ , toluene): 22,396 (250). Electrochemistry (V vs.  $Fc/Fc^+$  in THF/0.1 M [ $nBu_4N$ ][ $B(C_6F_5)_4$ ])  $E_{p,a} = -2.53$  V. Anal. Calcd for  $C_{36}H_{44}N_2F_2Th$  (mol. wt. 774.78): C, 55.81; H, 5.72; N, 3.62. Found: C, 55.82; H, 5.82; N, 3.55.

**Crystal Data and Structure Refinement for (C<sub>5</sub>Me<sub>5</sub>)<sub>2</sub>Th[-N=C(CH<sub>3</sub>)(4-F-C<sub>6</sub>H<sub>4</sub>)]<sub>2</sub> (2).**

|                                   |                                                                                                        |
|-----------------------------------|--------------------------------------------------------------------------------------------------------|
| Empirical formula                 | C <sub>36</sub> H <sub>44</sub> F <sub>2</sub> N <sub>2</sub> Th                                       |
| Formula weight                    | 774.77                                                                                                 |
| Temperature                       | 141(2) K                                                                                               |
| Wavelength                        | 0.71073 Å                                                                                              |
| Crystal system                    | Monoclinic                                                                                             |
| Space group                       | C 2/c                                                                                                  |
| Unit cell dimensions              | a = 12.9201(6) Å      α = 90°<br>b = 14.0054(7) Å      β = 98.677(1)°<br>c = 18.2113(9) Å      γ = 90° |
| Volume                            | 3257.6(3) Å <sup>3</sup>                                                                               |
| Z                                 | 4                                                                                                      |
| Density (calculated)              | 1.580 Mg/m <sup>3</sup>                                                                                |
| Absorption coefficient            | 4.615 mm <sup>-1</sup>                                                                                 |
| F(000)                            | 1528                                                                                                   |
| Crystal size                      | 0.24 x 0.16 x 0.14 mm <sup>3</sup>                                                                     |
| θ Range for data collection       | 2.16 to 28.85°                                                                                         |
| Index ranges                      | -17 ≤ h ≤ 17, -18 ≤ k ≤ 18, -23 ≤ l ≤ 23                                                               |
| Reflections collected             | 17967                                                                                                  |
| Independent reflections           | 4014 [R(int) = 0.0222]                                                                                 |
| Completeness to θ = 25.00°        | 100.0 %                                                                                                |
| Absorption correction             | Semi-empirical from equivalents                                                                        |
| Max. and min. transmission        | 0.5643 and 0.4038                                                                                      |
| Refinement method                 | Full-matrix least-squares on F <sup>2</sup>                                                            |
| Data / restraints / parameters    | 4014 / 0 / 192                                                                                         |
| Goodness-of-fit on F <sup>2</sup> | 1.323                                                                                                  |
| Final R indices [I > 2σ(I)]       | R1 = 0.0180, wR2 = 0.0484                                                                              |
| R indices (all data)              | R1 = 0.0197, wR2 = 0.0488                                                                              |
| Largest diff. peak and hole       | 1.510 and -0.277 e.Å <sup>-3</sup>                                                                     |

**Bond Lengths [Å] and Angles [°] for (C<sub>5</sub>Me<sub>5</sub>)<sub>2</sub>Th[-N=C(CH<sub>3</sub>)(4-F-C<sub>6</sub>H<sub>4</sub>)]<sub>2</sub> (2).**

|              |          |                     |            |
|--------------|----------|---------------------|------------|
| Th(1)-N(1)#1 | 2.250(2) | N(1)#1-Th(1)-N(1)   | 108.67(11) |
| Th(1)-N(1)   | 2.250(2) | N(1)#1-Th(1)-C(2)   | 92.73(7)   |
| Th(1)-C(2)   | 2.806(2) | N(1)-Th(1)-C(2)     | 124.27(7)  |
| Th(1)-C(2)#1 | 2.806(2) | N(1)#1-Th(1)-C(2)#1 | 124.27(7)  |
| Th(1)-C(3)   | 2.806(2) | N(1)-Th(1)-C(2)#1   | 92.73(7)   |
| Th(1)-C(3)#1 | 2.806(2) | C(2)-Th(1)-C(2)#1   | 116.84(9)  |
| Th(1)-C(4)   | 2.818(2) | N(1)#1-Th(1)-C(3)   | 121.60(7)  |
| Th(1)-C(4)#1 | 2.818(2) | N(1)-Th(1)-C(3)     | 105.05(7)  |
| Th(1)-C(1)   | 2.821(2) | C(2)-Th(1)-C(3)     | 29.36(7)   |
| Th(1)-C(1)#1 | 2.821(2) | C(2)#1-Th(1)-C(3)   | 99.66(7)   |
| Th(1)-C(5)#1 | 2.821(2) | N(1)#1-Th(1)-C(3)#1 | 105.05(7)  |
| Th(1)-C(5)   | 2.821(2) | N(1)-Th(1)-C(3)#1   | 121.60(7)  |
| F(1)-C(16)   | 1.358(4) | C(2)-Th(1)-C(3)#1   | 99.66(7)   |
| N(1)-C(11)   | 1.260(3) | C(2)#1-Th(1)-C(3)#1 | 29.36(7)   |
| C(1)-C(2)    | 1.413(3) | C(3)-Th(1)-C(3)#1   | 95.57(10)  |
| C(1)-C(5)    | 1.418(3) | N(1)#1-Th(1)-C(4)   | 122.64(7)  |
| C(1)-C(6)    | 1.508(3) | N(1)-Th(1)-C(4)     | 77.87(7)   |
| C(2)-C(3)    | 1.422(3) | C(2)-Th(1)-C(4)     | 48.20(7)   |
| C(2)-C(7)    | 1.504(3) | C(2)#1-Th(1)-C(4)   | 111.77(7)  |
| C(3)-C(4)    | 1.420(3) | C(3)-Th(1)-C(4)     | 29.25(7)   |
| C(3)-C(8)    | 1.512(3) | C(3)#1-Th(1)-C(4)   | 119.54(7)  |
| C(4)-C(5)    | 1.421(3) | N(1)#1-Th(1)-C(4)#1 | 77.87(7)   |
| C(4)-C(9)    | 1.505(3) | N(1)-Th(1)-C(4)#1   | 122.64(7)  |
| C(5)-C(10)   | 1.507(3) | C(2)-Th(1)-C(4)#1   | 111.77(7)  |
| C(11)-C(13)  | 1.504(4) | C(2)#1-Th(1)-C(4)#1 | 48.20(7)   |
| C(11)-C(12)  | 1.520(3) | C(3)-Th(1)-C(4)#1   | 119.54(7)  |
| C(13)-C(14)  | 1.397(4) | C(3)#1-Th(1)-C(4)#1 | 29.25(7)   |
| C(13)-C(18)  | 1.408(3) | C(4)-Th(1)-C(4)#1   | 147.20(10) |
| C(14)-C(15)  | 1.381(4) | N(1)#1-Th(1)-C(1)   | 77.01(7)   |
| C(15)-C(16)  | 1.381(4) | N(1)-Th(1)-C(1)     | 106.25(7)  |
| C(16)-C(17)  | 1.375(5) | C(2)-Th(1)-C(1)     | 29.08(6)   |
| C(17)-C(18)  | 1.377(4) | C(2)#1-Th(1)-C(1)   | 145.52(6)  |
|              |          | C(3)-Th(1)-C(1)     | 48.15(6)   |
|              |          | C(3)#1-Th(1)-C(1)   | 127.13(6)  |

|                     |            |                   |            |
|---------------------|------------|-------------------|------------|
| C(4)-Th(1)-C(1)     | 48.03(7)   | C(2)-C(1)-Th(1)   | 74.88(13)  |
| C(4)#1-Th(1)-C(1)   | 129.94(7)  | C(5)-C(1)-Th(1)   | 75.45(13)  |
| N(1)#1-Th(1)-C(1)#1 | 106.25(7)  | C(6)-C(1)-Th(1)   | 120.24(15) |
| N(1)-Th(1)-C(1)#1   | 77.01(7)   | C(1)-C(2)-C(3)    | 108.1(2)   |
| C(2)-Th(1)-C(1)#1   | 145.52(6)  | C(1)-C(2)-C(7)    | 125.4(2)   |
| C(2)#1-Th(1)-C(1)#1 | 29.08(6)   | C(3)-C(2)-C(7)    | 126.3(2)   |
| C(3)-Th(1)-C(1)#1   | 127.13(6)  | C(1)-C(2)-Th(1)   | 76.04(13)  |
| C(3)#1-Th(1)-C(1)#1 | 48.15(6)   | C(3)-C(2)-Th(1)   | 75.31(12)  |
| C(4)-Th(1)-C(1)#1   | 129.94(7)  | C(7)-C(2)-Th(1)   | 118.47(15) |
| C(4)#1-Th(1)-C(1)#1 | 48.03(7)   | C(4)-C(3)-C(2)    | 107.8(2)   |
| C(1)-Th(1)-C(1)#1   | 174.58(8)  | C(4)-C(3)-C(8)    | 124.8(2)   |
| N(1)#1-Th(1)-C(5)#1 | 78.65(7)   | C(2)-C(3)-C(8)    | 127.1(2)   |
| N(1)-Th(1)-C(5)#1   | 94.38(7)   | C(4)-C(3)-Th(1)   | 75.85(12)  |
| C(2)-Th(1)-C(5)#1   | 140.88(7)  | C(2)-C(3)-Th(1)   | 75.33(12)  |
| C(2)#1-Th(1)-C(5)#1 | 48.11(7)   | C(8)-C(3)-Th(1)   | 120.01(15) |
| C(3)-Th(1)-C(5)#1   | 143.62(7)  | C(3)-C(4)-C(5)    | 108.0(2)   |
| C(3)#1-Th(1)-C(5)#1 | 48.22(7)   | C(3)-C(4)-C(9)    | 125.6(2)   |
| C(4)-Th(1)-C(5)#1   | 158.64(7)  | C(5)-C(4)-C(9)    | 126.1(2)   |
| C(4)#1-Th(1)-C(5)#1 | 29.19(6)   | C(3)-C(4)-Th(1)   | 74.90(13)  |
| C(1)-Th(1)-C(5)#1   | 152.05(7)  | C(5)-C(4)-Th(1)   | 75.52(13)  |
| C(1)#1-Th(1)-C(5)#1 | 29.12(7)   | C(9)-C(4)-Th(1)   | 120.12(15) |
| N(1)#1-Th(1)-C(5)   | 94.38(7)   | C(1)-C(5)-C(4)    | 107.9(2)   |
| N(1)-Th(1)-C(5)     | 78.65(7)   | C(1)-C(5)-C(10)   | 125.8(2)   |
| C(2)-Th(1)-C(5)     | 48.11(7)   | C(4)-C(5)-C(10)   | 126.2(2)   |
| C(2)#1-Th(1)-C(5)   | 140.88(7)  | C(1)-C(5)-Th(1)   | 75.43(13)  |
| C(3)-Th(1)-C(5)     | 48.22(7)   | C(4)-C(5)-Th(1)   | 75.28(13)  |
| C(3)#1-Th(1)-C(5)   | 143.62(7)  | C(10)-C(5)-Th(1)  | 118.71(14) |
| C(4)-Th(1)-C(5)     | 29.19(6)   | N(1)-C(11)-C(13)  | 122.3(2)   |
| C(4)#1-Th(1)-C(5)   | 158.64(7)  | N(1)-C(11)-C(12)  | 121.3(2)   |
| C(1)-Th(1)-C(5)     | 29.12(7)   | C(13)-C(11)-C(12) | 116.4(2)   |
| C(1)#1-Th(1)-C(5)   | 152.05(7)  | C(14)-C(13)-C(18) | 117.7(3)   |
| C(5)#1-Th(1)-C(5)   | 168.14(9)  | C(14)-C(13)-C(11) | 119.29(19) |
| C(11)-N(1)-Th(1)    | 175.29(19) | C(18)-C(13)-C(11) | 123.0(2)   |
| C(2)-C(1)-C(5)      | 108.2(2)   | C(15)-C(14)-C(13) | 121.5(2)   |
| C(2)-C(1)-C(6)      | 126.3(2)   | C(16)-C(15)-C(14) | 118.3(3)   |
| C(5)-C(1)-C(6)      | 125.2(2)   | F(1)-C(16)-C(17)  | 118.9(2)   |

|                   |          |
|-------------------|----------|
| F(1)-C(16)-C(15)  | 118.5(3) |
| C(17)-C(16)-C(15) | 122.6(3) |
| C(16)-C(17)-C(18) | 118.4(2) |
| C(17)-C(18)-C(13) | 121.5(3) |



**Crystal Data and Structure Refinement for (C<sub>5</sub>Me<sub>5</sub>)<sub>2</sub>Th[-N=C(4-F-C<sub>6</sub>H<sub>4</sub>)-N=C(4-F-C<sub>6</sub>H<sub>4</sub>)-N-C(4-F-C<sub>6</sub>H<sub>4</sub>)=N-C(4-F-C<sub>6</sub>H<sub>4</sub>)(CH<sub>3</sub>)<sub>2</sub>] (3).**

|                                   |                                                                                                           |
|-----------------------------------|-----------------------------------------------------------------------------------------------------------|
| Empirical formula                 | C <sub>55</sub> H <sub>64</sub> F <sub>4</sub> N <sub>4</sub> Th                                          |
| Formula weight                    | 1089.14                                                                                                   |
| Temperature                       | 141(2) K                                                                                                  |
| Wavelength                        | 0.71073 Å                                                                                                 |
| Crystal system                    | Monoclinic                                                                                                |
| Space group                       | C 2/c                                                                                                     |
| Unit cell dimensions              | a = 24.6845(13) Å      α = 90°<br>b = 18.9028(10) Å      β = 95.014(1)°<br>c = 20.7781(11) Å      γ = 90° |
| Volume                            | 9658.1(9) Å <sup>3</sup>                                                                                  |
| Z                                 | 8                                                                                                         |
| Density (calculated)              | 1.498 Mg/m <sup>3</sup>                                                                                   |
| Absorption coefficient            | 3.144 mm <sup>-1</sup>                                                                                    |
| F(000)                            | 4384                                                                                                      |
| Crystal size                      | 0.16 x 0.10 x 0.10 mm <sup>3</sup>                                                                        |
| θ Range for data collection       | 1.63 to 25.65°.                                                                                           |
| Index ranges                      | -29 ≤ h ≤ 29, -21 ≤ k ≤ 22, -25 ≤ l ≤ 25                                                                  |
| Reflections collected             | 40160                                                                                                     |
| Independent reflections           | 9059 [R(int) = 0.0631]                                                                                    |
| Completeness to θ = 25.00°        | 99.9 %                                                                                                    |
| Absorption correction             | Semi-empirical from equivalents                                                                           |
| Max. and min. transmission        | 0.7439 and 0.6331                                                                                         |
| Refinement method                 | Full-matrix least-squares on F <sup>2</sup>                                                               |
| Data / restraints / parameters    | 9059 / 0 / 544                                                                                            |
| Goodness-of-fit on F <sup>2</sup> | 1.011                                                                                                     |
| Final R indices [I > 2σ(I)]       | R1 = 0.0363, wR2 = 0.0929                                                                                 |
| R indices (all data)              | R1 = 0.0505, wR2 = 0.0985                                                                                 |
| Largest diff. peak and hole       | 1.273 and -1.136 e.Å <sup>-3</sup>                                                                        |

**Bond Lengths [Å] and Angles [°] for (C<sub>5</sub>Me<sub>5</sub>)<sub>2</sub>Th[-N=C(4-F-C<sub>6</sub>H<sub>4</sub>)-N=C(4-F-C<sub>6</sub>H<sub>4</sub>)-N-C(4-F-C<sub>6</sub>H<sub>4</sub>)-N-C(4-F-C<sub>6</sub>H<sub>4</sub>)(CH<sub>3</sub>)<sub>2</sub>] (3).**

---

|             |          |             |          |
|-------------|----------|-------------|----------|
| Th(1)-N(4)  | 2.234(4) | C(4)-C(5)   | 1.397(7) |
| Th(1)-N(2)  | 2.451(4) | C(4)-C(9)   | 1.529(7) |
| Th(1)-N(1)  | 2.727(4) | C(5)-C(10)  | 1.503(7) |
| Th(1)-C(3)  | 2.797(5) | C(11)-C(12) | 1.406(7) |
| Th(1)-C(4)  | 2.828(5) | C(11)-C(15) | 1.418(7) |
| Th(1)-C(11) | 2.837(5) | C(11)-C(16) | 1.516(8) |
| Th(1)-C(2)  | 2.843(5) | C(12)-C(13) | 1.416(7) |
| Th(1)-C(12) | 2.846(5) | C(12)-C(17) | 1.515(7) |
| Th(1)-C(5)  | 2.864(5) | C(13)-C(14) | 1.427(7) |
| Th(1)-C(15) | 2.865(5) | C(13)-C(18) | 1.510(7) |
| Th(1)-C(13) | 2.873(5) | C(14)-C(15) | 1.401(8) |
| Th(1)-C(1)  | 2.875(6) | C(14)-C(19) | 1.514(8) |
| Th(1)-C(14) | 2.892(5) | C(15)-C(20) | 1.506(7) |
| Th(1)-C(30) | 3.057(5) | C(21)-C(23) | 1.503(8) |
| Th(1)-N(3)  | 3.879(4) | C(21)-C(22) | 1.520(7) |
| F(1)-C(27)  | 1.405(6) | C(21)-C(24) | 1.540(7) |
| F(2)-C(34)  | 1.346(6) | C(24)-C(29) | 1.388(7) |
| F(3)-C(41)  | 1.344(5) | C(24)-C(25) | 1.386(6) |
| F(4)-C(48)  | 1.380(5) | C(25)-C(26) | 1.360(8) |
| N(1)-C(30)  | 1.313(6) | C(26)-C(27) | 1.338(9) |
| N(1)-C(21)  | 1.518(6) | C(27)-C(28) | 1.376(9) |
| N(2)-C(30)  | 1.378(6) | C(28)-C(29) | 1.390(8) |
| N(2)-C(37)  | 1.383(6) | C(30)-C(31) | 1.510(7) |
| N(3)-C(37)  | 1.285(6) | C(31)-C(36) | 1.402(7) |
| N(3)-C(44)  | 1.406(6) | C(31)-C(32) | 1.408(7) |
| N(4)-C(44)  | 1.268(6) | C(32)-C(33) | 1.385(8) |
| C(1)-C(5)   | 1.400(7) | C(33)-C(34) | 1.385(9) |
| C(1)-C(2)   | 1.417(7) | C(34)-C(35) | 1.359(7) |
| C(1)-C(6)   | 1.520(7) | C(35)-C(36) | 1.373(7) |
| C(2)-C(3)   | 1.413(7) | C(37)-C(38) | 1.513(6) |
| C(2)-C(7)   | 1.493(7) | C(38)-C(43) | 1.371(7) |
| C(3)-C(4)   | 1.411(7) | C(38)-C(39) | 1.419(8) |
| C(3)-C(8)   | 1.514(7) | C(39)-C(40) | 1.404(8) |

---

---

|                  |            |                   |            |
|------------------|------------|-------------------|------------|
| C(40)-C(41)      | 1.348(9)   | C(4)-Th(1)-C(12)  | 164.01(16) |
| C(41)-C(42)      | 1.363(8)   | C(11)-Th(1)-C(12) | 28.65(14)  |
| C(42)-C(43)      | 1.399(7)   | C(2)-Th(1)-C(12)  | 128.47(14) |
| C(44)-C(45)      | 1.513(6)   | N(4)-Th(1)-C(5)   | 92.79(15)  |
| C(45)-C(46)      | 1.377(7)   | N(2)-Th(1)-C(5)   | 84.48(14)  |
| C(45)-C(50)      | 1.405(7)   | N(1)-Th(1)-C(5)   | 86.46(13)  |
| C(46)-C(47)      | 1.381(7)   | C(3)-Th(1)-C(5)   | 47.61(15)  |
| C(47)-C(48)      | 1.346(7)   | C(4)-Th(1)-C(5)   | 28.41(15)  |
| C(48)-C(49)      | 1.372(8)   | C(11)-Th(1)-C(5)  | 165.97(16) |
| C(49)-C(50)      | 1.383(7)   | C(2)-Th(1)-C(5)   | 47.29(14)  |
|                  |            | C(12)-Th(1)-C(5)  | 165.27(15) |
| N(4)-Th(1)-N(2)  | 69.78(13)  | N(4)-Th(1)-C(15)  | 75.15(15)  |
| N(4)-Th(1)-N(1)  | 120.09(12) | N(2)-Th(1)-C(15)  | 121.85(15) |
| N(2)-Th(1)-N(1)  | 50.49(12)  | N(1)-Th(1)-C(15)  | 130.34(13) |
| N(4)-Th(1)-C(3)  | 81.60(15)  | C(3)-Th(1)-C(15)  | 95.22(15)  |
| N(2)-Th(1)-C(3)  | 122.67(15) | C(4)-Th(1)-C(15)  | 116.66(16) |
| N(1)-Th(1)-C(3)  | 131.85(14) | C(11)-Th(1)-C(15) | 28.79(15)  |
| N(4)-Th(1)-C(4)  | 70.98(16)  | C(2)-Th(1)-C(15)  | 103.50(16) |
| N(2)-Th(1)-C(4)  | 93.75(15)  | C(12)-Th(1)-C(15) | 47.36(14)  |
| N(1)-Th(1)-C(4)  | 112.92(14) | C(5)-Th(1)-C(15)  | 142.64(15) |
| C(3)-Th(1)-C(4)  | 29.05(15)  | N(4)-Th(1)-C(13)  | 119.61(14) |
| N(4)-Th(1)-C(11) | 74.50(15)  | N(2)-Th(1)-C(13)  | 122.61(15) |
| N(2)-Th(1)-C(11) | 96.33(14)  | N(1)-Th(1)-C(13)  | 92.21(14)  |
| N(1)-Th(1)-C(11) | 104.90(14) | C(3)-Th(1)-C(13)  | 114.69(16) |
| C(3)-Th(1)-C(11) | 122.83(15) | C(4)-Th(1)-C(13)  | 143.62(16) |
| C(4)-Th(1)-C(11) | 137.87(16) | C(11)-Th(1)-C(13) | 47.05(14)  |
| N(4)-Th(1)-C(2)  | 110.56(15) | C(2)-Th(1)-C(13)  | 99.88(14)  |
| N(2)-Th(1)-C(2)  | 131.55(14) | C(12)-Th(1)-C(13) | 28.67(14)  |
| N(1)-Th(1)-C(2)  | 111.82(13) | C(5)-Th(1)-C(13)  | 142.42(14) |
| C(3)-Th(1)-C(2)  | 29.00(14)  | C(15)-Th(1)-C(13) | 47.05(14)  |
| C(4)-Th(1)-C(2)  | 47.34(14)  | N(4)-Th(1)-C(1)   | 117.42(14) |
| C(11)-Th(1)-C(2) | 131.39(15) | N(2)-Th(1)-C(1)   | 105.54(14) |
| N(4)-Th(1)-C(12) | 101.41(16) | N(1)-Th(1)-C(1)   | 85.88(13)  |
| N(2)-Th(1)-C(12) | 96.70(14)  | C(3)-Th(1)-C(1)   | 47.35(14)  |
| N(1)-Th(1)-C(12) | 83.08(13)  | C(4)-Th(1)-C(1)   | 46.61(15)  |
| C(3)-Th(1)-C(12) | 138.07(14) |                   |            |

---

---

|                   |            |                  |            |
|-------------------|------------|------------------|------------|
| C(11)-Th(1)-C(1)  | 157.60(14) | C(4)-Th(1)-N(3)  | 76.99(12)  |
| C(2)-Th(1)-C(1)   | 28.69(14)  | C(11)-Th(1)-N(3) | 87.96(11)  |
| C(12)-Th(1)-C(1)  | 139.85(15) | C(2)-Th(1)-N(3)  | 124.33(11) |
| C(5)-Th(1)-C(1)   | 28.23(14)  | C(12)-Th(1)-N(3) | 104.97(13) |
| C(15)-Th(1)-C(1)  | 131.77(16) | C(5)-Th(1)-N(3)  | 84.57(12)  |
| C(13)-Th(1)-C(1)  | 114.19(14) | C(15)-Th(1)-N(3) | 101.84(13) |
| N(4)-Th(1)-C(14)  | 102.04(15) | C(13)-Th(1)-N(3) | 132.87(12) |
| N(2)-Th(1)-C(14)  | 141.96(15) | C(1)-Th(1)-N(3)  | 112.67(12) |
| N(1)-Th(1)-C(14)  | 120.79(14) | C(14)-Th(1)-N(3) | 129.90(13) |
| C(3)-Th(1)-C(14)  | 91.07(15)  | C(30)-Th(1)-N(3) | 61.58(10)  |
| C(4)-Th(1)-C(14)  | 119.38(15) | C(30)-N(1)-C(21) | 124.2(4)   |
| C(11)-Th(1)-C(14) | 46.83(14)  | C(30)-N(1)-Th(1) | 91.5(3)    |
| C(2)-Th(1)-C(14)  | 86.44(14)  | C(21)-N(1)-Th(1) | 140.5(3)   |
| C(12)-Th(1)-C(14) | 47.14(14)  | C(30)-N(2)-C(37) | 125.3(4)   |
| C(5)-Th(1)-C(14)  | 133.55(14) | C(30)-N(2)-Th(1) | 102.3(3)   |
| C(15)-Th(1)-C(14) | 28.16(15)  | C(37)-N(2)-Th(1) | 132.4(3)   |
| C(13)-Th(1)-C(14) | 28.66(15)  | C(37)-N(3)-C(44) | 121.2(4)   |
| C(1)-Th(1)-C(14)  | 110.77(15) | C(37)-N(3)-Th(1) | 65.0(3)    |
| N(4)-Th(1)-C(30)  | 94.84(13)  | C(44)-N(3)-Th(1) | 56.6(2)    |
| N(2)-Th(1)-C(30)  | 26.13(12)  | C(44)-N(4)-Th(1) | 141.3(3)   |
| N(1)-Th(1)-C(30)  | 25.42(11)  | C(5)-C(1)-C(2)   | 108.7(4)   |
| C(3)-Th(1)-C(30)  | 137.18(14) | C(5)-C(1)-C(6)   | 126.5(5)   |
| C(4)-Th(1)-C(30)  | 109.64(15) | C(2)-C(1)-C(6)   | 123.7(5)   |
| C(11)-Th(1)-C(30) | 96.49(14)  | C(5)-C(1)-Th(1)  | 75.4(3)    |
| C(2)-Th(1)-C(30)  | 129.59(14) | C(2)-C(1)-Th(1)  | 74.4(3)    |
| C(12)-Th(1)-C(30) | 84.62(13)  | C(6)-C(1)-Th(1)  | 125.9(3)   |
| C(5)-Th(1)-C(30)  | 90.37(14)  | C(3)-C(2)-C(1)   | 107.3(4)   |
| C(15)-Th(1)-C(30) | 125.28(15) | C(3)-C(2)-C(7)   | 127.6(5)   |
| C(13)-Th(1)-C(30) | 104.15(15) | C(1)-C(2)-C(7)   | 124.3(5)   |
| C(1)-Th(1)-C(30)  | 100.99(13) | C(3)-C(2)-Th(1)  | 73.7(3)    |
| C(14)-Th(1)-C(30) | 130.95(14) | C(1)-C(2)-Th(1)  | 76.9(3)    |
| N(4)-Th(1)-N(3)   | 34.42(11)  | C(7)-C(2)-Th(1)  | 123.3(4)   |
| N(2)-Th(1)-N(3)   | 35.74(11)  | C(2)-C(3)-C(4)   | 107.5(4)   |
| N(1)-Th(1)-N(3)   | 86.22(9)   | C(2)-C(3)-C(8)   | 126.2(5)   |
| C(3)-Th(1)-N(3)   | 100.41(12) | C(4)-C(3)-C(8)   | 126.0(5)   |

---

---

|                   |          |                   |          |
|-------------------|----------|-------------------|----------|
| C(2)-C(3)-Th(1)   | 77.3(3)  | C(13)-C(14)-C(19) | 124.4(6) |
| C(4)-C(3)-Th(1)   | 76.7(3)  | C(15)-C(14)-Th(1) | 74.9(3)  |
| C(8)-C(3)-Th(1)   | 117.6(4) | C(13)-C(14)-Th(1) | 74.9(3)  |
| C(5)-C(4)-C(3)    | 108.9(4) | C(19)-C(14)-Th(1) | 126.6(4) |
| C(5)-C(4)-C(9)    | 125.3(5) | C(14)-C(15)-C(11) | 107.8(4) |
| C(3)-C(4)-C(9)    | 125.4(5) | C(14)-C(15)-C(20) | 124.2(6) |
| C(5)-C(4)-Th(1)   | 77.2(3)  | C(11)-C(15)-C(20) | 127.4(6) |
| C(3)-C(4)-Th(1)   | 74.2(3)  | C(14)-C(15)-Th(1) | 77.0(3)  |
| C(9)-C(4)-Th(1)   | 120.2(4) | C(11)-C(15)-Th(1) | 74.5(3)  |
| C(4)-C(5)-C(1)    | 107.6(4) | C(20)-C(15)-Th(1) | 121.6(4) |
| C(4)-C(5)-C(10)   | 123.1(5) | C(23)-C(21)-N(1)  | 114.3(4) |
| C(1)-C(5)-C(10)   | 128.8(5) | C(23)-C(21)-C(22) | 106.0(5) |
| C(4)-C(5)-Th(1)   | 74.4(3)  | N(1)-C(21)-C(22)  | 104.7(4) |
| C(1)-C(5)-Th(1)   | 76.3(3)  | C(23)-C(21)-C(24) | 113.0(5) |
| C(10)-C(5)-Th(1)  | 121.1(3) | N(1)-C(21)-C(24)  | 110.5(4) |
| C(12)-C(11)-C(15) | 108.6(5) | C(22)-C(21)-C(24) | 107.6(4) |
| C(12)-C(11)-C(16) | 126.9(6) | C(29)-C(24)-C(25) | 117.6(5) |
| C(15)-C(11)-C(16) | 124.1(5) | C(29)-C(24)-C(21) | 121.1(4) |
| C(12)-C(11)-Th(1) | 76.1(3)  | C(25)-C(24)-C(21) | 121.2(4) |
| C(15)-C(11)-Th(1) | 76.7(3)  | C(26)-C(25)-C(24) | 122.0(6) |
| C(16)-C(11)-Th(1) | 118.6(3) | C(27)-C(26)-C(25) | 117.9(5) |
| C(11)-C(12)-C(13) | 107.7(4) | C(26)-C(27)-C(28) | 124.9(5) |
| C(11)-C(12)-C(17) | 124.2(5) | C(26)-C(27)-F(1)  | 119.2(6) |
| C(13)-C(12)-C(17) | 126.8(5) | C(28)-C(27)-F(1)  | 115.9(7) |
| C(11)-C(12)-Th(1) | 75.3(3)  | C(27)-C(28)-C(29) | 115.8(6) |
| C(13)-C(12)-Th(1) | 76.7(3)  | C(24)-C(29)-C(28) | 121.8(5) |
| C(17)-C(12)-Th(1) | 124.4(3) | N(1)-C(30)-N(2)   | 111.3(4) |
| C(12)-C(13)-C(14) | 107.7(4) | N(1)-C(30)-C(31)  | 129.0(4) |
| C(12)-C(13)-C(18) | 127.4(5) | N(2)-C(30)-C(31)  | 118.6(4) |
| C(14)-C(13)-C(18) | 124.2(5) | N(1)-C(30)-Th(1)  | 63.1(2)  |
| C(12)-C(13)-Th(1) | 74.6(3)  | N(2)-C(30)-Th(1)  | 51.6(2)  |
| C(14)-C(13)-Th(1) | 76.4(3)  | C(31)-C(30)-Th(1) | 151.6(3) |
| C(18)-C(13)-Th(1) | 122.8(4) | C(36)-C(31)-C(32) | 117.9(5) |
| C(15)-C(14)-C(13) | 108.2(4) | C(36)-C(31)-C(30) | 118.1(4) |
| C(15)-C(14)-C(19) | 126.1(6) | C(32)-C(31)-C(30) | 123.9(5) |

---

---

|                   |          |
|-------------------|----------|
| C(33)-C(32)-C(31) | 119.7(6) |
| C(32)-C(33)-C(34) | 119.1(5) |
| F(2)-C(34)-C(35)  | 119.4(6) |
| F(2)-C(34)-C(33)  | 117.4(5) |
| C(35)-C(34)-C(33) | 123.1(6) |
| C(34)-C(35)-C(36) | 117.5(5) |
| C(35)-C(36)-C(31) | 122.6(5) |
| N(3)-C(37)-N(2)   | 125.3(4) |
| N(3)-C(37)-C(38)  | 114.1(4) |
| N(2)-C(37)-C(38)  | 120.2(4) |
| C(43)-C(38)-C(39) | 118.5(4) |
| C(43)-C(38)-C(37) | 120.2(5) |
| C(39)-C(38)-C(37) | 121.1(5) |
| C(40)-C(39)-C(38) | 118.8(5) |
| C(41)-C(40)-C(39) | 120.3(6) |
| F(3)-C(41)-C(40)  | 118.6(5) |
| F(3)-C(41)-C(42)  | 119.1(5) |
| C(40)-C(41)-C(42) | 122.3(5) |
| C(41)-C(42)-C(43) | 118.4(5) |
| C(38)-C(43)-C(42) | 121.7(5) |
| N(4)-C(44)-N(3)   | 127.2(4) |
| N(4)-C(44)-C(45)  | 121.7(4) |
| N(3)-C(44)-C(45)  | 111.1(4) |
| C(46)-C(45)-C(50) | 118.1(4) |
| C(46)-C(45)-C(44) | 123.1(4) |
| C(50)-C(45)-C(44) | 118.8(4) |
| C(45)-C(46)-C(47) | 121.3(5) |
| C(48)-C(47)-C(46) | 118.9(5) |
| C(47)-C(48)-C(49) | 122.8(5) |
| C(47)-C(48)-F(4)  | 118.3(5) |
| C(49)-C(48)-F(4)  | 118.8(5) |
| C(48)-C(49)-C(50) | 118.2(5) |
| C(49)-C(50)-C(45) | 120.7(5) |

---
